# Supplementary material for: Clinical Symptoms and Outcomes of Severe Pneumonia Caused by Chlamydia psittaci in Southwest China
Source: PubMed Central journal article supplement (PMC8770948; doi:10.3389/fcimb.2021.727594), 2022-01-06
Supplement: DataSheet_1.pdf [file DataSheet_1.pdf]

| patient | survivor | mNGS results and reads from BALF                                                               |
|---------|----------|------------------------------------------------------------------------------------------------|
| 1       | YES      | Chlamydia psittaci (338)                                                                       |
| 2       | NO       | Chlamydia psittaci (7347)                                                                      |
| 3       | YES      | Chlamydia psittaci (14), Candida glabrata (18)                                                 |
| 4       | YES      | Chlamydia psittaci (72)                                                                        |
| 5       | YES      | Chlamydia psittaci (2880), Candida albicans(5)                                                 |
| 6       | YES      | Chlamydia psittaci (748)                                                                       |
| 7       | YES      | Chlamydia psittaci (1367)                                                                      |
| 8       | YES      | Chlamydia psittaci (75), Rothia aerea (30)                                                     |
| 9       | NO       | Chlamydia psittaci (15234), Corynebacterium striatum (12)                                      |
| 10      | YES      | Chlamydia psittaci(7),<br>Veillonellaparvula(26),<br>Campylobacter conCisus(6)                 |
| 11      | YES      | Chlamydia psittaci (1187), Corynebacterium striatum(8), Klebsiella Pneumoniae(22)              |
| 12      | YES      | Chlamydia psittaci (36), cytomegalovirus(5)                                                    |
| 13      | YES      | Chlamydia psittaci (166), Streptococcus salivarius(12)                                         |
| 14      | YES      | Chlamydia psittaci (88)                                                                        |
| 15      | YES      | Chlamydia psittaci (777), herpes simplex virus-1(12)                                           |
| 16      | YES      | Chlamydia psittaci (150)                                                                       |
| 17      | YES      | Chlamydia psittaci (13)                                                                        |
| 18      | YES      | Chlamydia psittaci (27), candida Albicans (20)                                                 |
| 19      | YES      | Chlamydia psittaci (152)                                                                       |
| 20      | YES      | Chlamydia psittaci (58), Streptococcus pneumoniae (33)                                         |
| 21      | YES      | Chlamydia psittaci (4357), Acinetobacter baumannii complex (363)                               |
| 22      | NO       | Chlamydia psittaci (337)                                                                       |
| 23      | YES      | Chlamydia psittaci (1367)                                                                      |
| 24      | YES      | Chlamydia psittaci (353), Raoultella ornithinolytica (4)                                       |
| 25      | YES      | Chlamydia psittaci (5351), Corynebacterium striatum (4),<br>Acinetobacter baumannii complex(4) |
| 26      | YES      | Chlamydia psittaci (114), Rothia Geory and Brown(28)                                           |
| 27      | NO       | Chlamydia psittaci (1716), Haemophilus influenzae (5)                                          |
